# Supplementary material for: Fundamental material property trends in the La0.8-xNdxCa0.2FeO3-δ series: crystal structure and thermal expansion
Source: Springer Nature journal article supplement (doi:10.1007/s10853-021-05851-z), 2021-02-25
Supplement: MOESM1 [file 18904792]

---

# Supplementary Material

---

Fundamental material property trends in the  $\text{La}_{0.8-x}\text{Nd}_x\text{Ca}_{0.2}\text{FeO}_{3-\delta}$   
series: crystal structure and thermal expansion

Christian Berger <sup>a</sup>, Edith Bucher <sup>a,\*</sup>, Judith Lammer <sup>b</sup>, Christina Nader <sup>a</sup>,  
Werner Sitte <sup>a</sup>

<sup>a</sup> *Chair of Physical Chemistry, Montanuniversitaet Leoben, Franz-Josef-Straße 18,  
A-8700 Leoben, Austria*

<sup>b</sup> *Institute of Electron Microscopy and Nanoanalysis (FELMI), Graz University of Technology  
& Graz Centre for Electron Microscopy (ZFE), Steyrergasse 17, A-8010 Graz, Austria*

# Contents

|                                                  |    |
|--------------------------------------------------|----|
| <b>1. Material characterisation</b> .....        | 3  |
| 1.1 Quantitative phase analysis .....            | 3  |
| 1.2 Thermal expansion and phase transition ..... | 4  |
| <b>2. References</b> .....                       | 11 |

# 1. Material characterisation

## 1.1 Quantitative phase analysis

Formation of secondary phases (CaO and  $\text{Ca}_2\text{Fe}_2\text{O}_5$ ) were caused by substitution with high concentrations of Nd ( $x \geq 0.7$  for  $\text{La}_{0.8-x}\text{Nd}_x\text{Ca}_{0.2}\text{FeO}_{3-\delta}$ ). Table S-1 gives the results of the XRD quantitative phase analysis for  $\text{La}_{0.1}\text{Nd}_{0.7}\text{Ca}_{0.2}\text{FeO}_{3-\delta}$ .

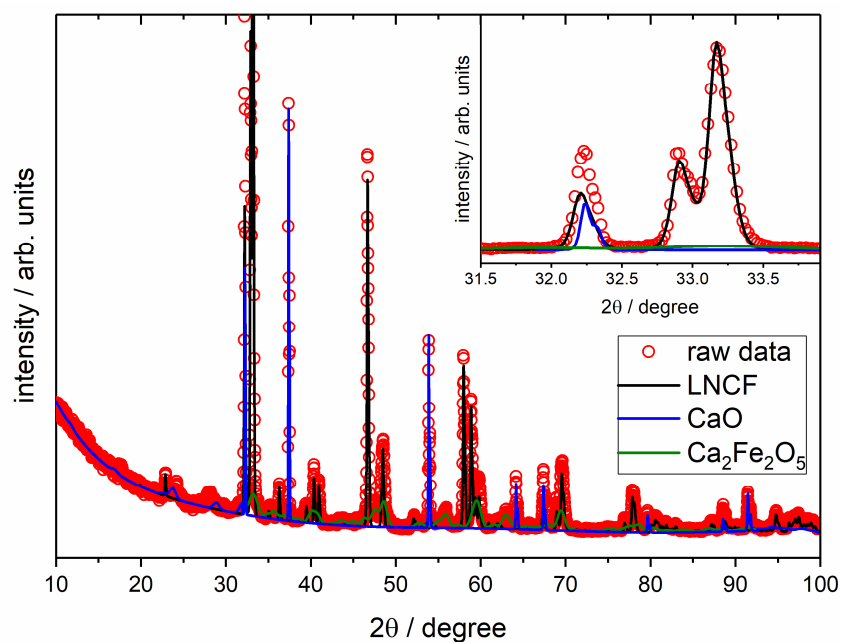

**Fig. S-1.** Room temperature powder diffraction pattern of  $\text{La}_{0.1}\text{Nd}_{0.7}\text{Ca}_{0.2}\text{FeO}_{3-\delta}$  (LNCF) (circles) and fit obtained from Rietveld refinement (solid lines represent the refined patterns of CaO and  $\text{Ca}_2\text{Fe}_2\text{O}_5$ ; quantitative analysis in Table S-1).

**Tab. S-1.** Weight percent fraction of the  $\text{La}_{0.1}\text{Nd}_{0.7}\text{Ca}_{0.2}\text{FeO}_{3-\delta}$  phase mixture calcined at  $1200^\circ\text{C}$  for 10 h.

| compound                                                             | wt-% |
|----------------------------------------------------------------------|------|
| $\text{La}_{0.8-x}\text{Nd}_x\text{Ca}_{0.2}\text{FeO}_{3-\delta}$ * | 66   |
| CaO                                                                  | 26   |
| $\text{Ca}_2\text{Fe}_2\text{O}_5$                                   | 8    |

\*matrix with unknown cation composition.

## 1.2 Thermal expansion and phase transition

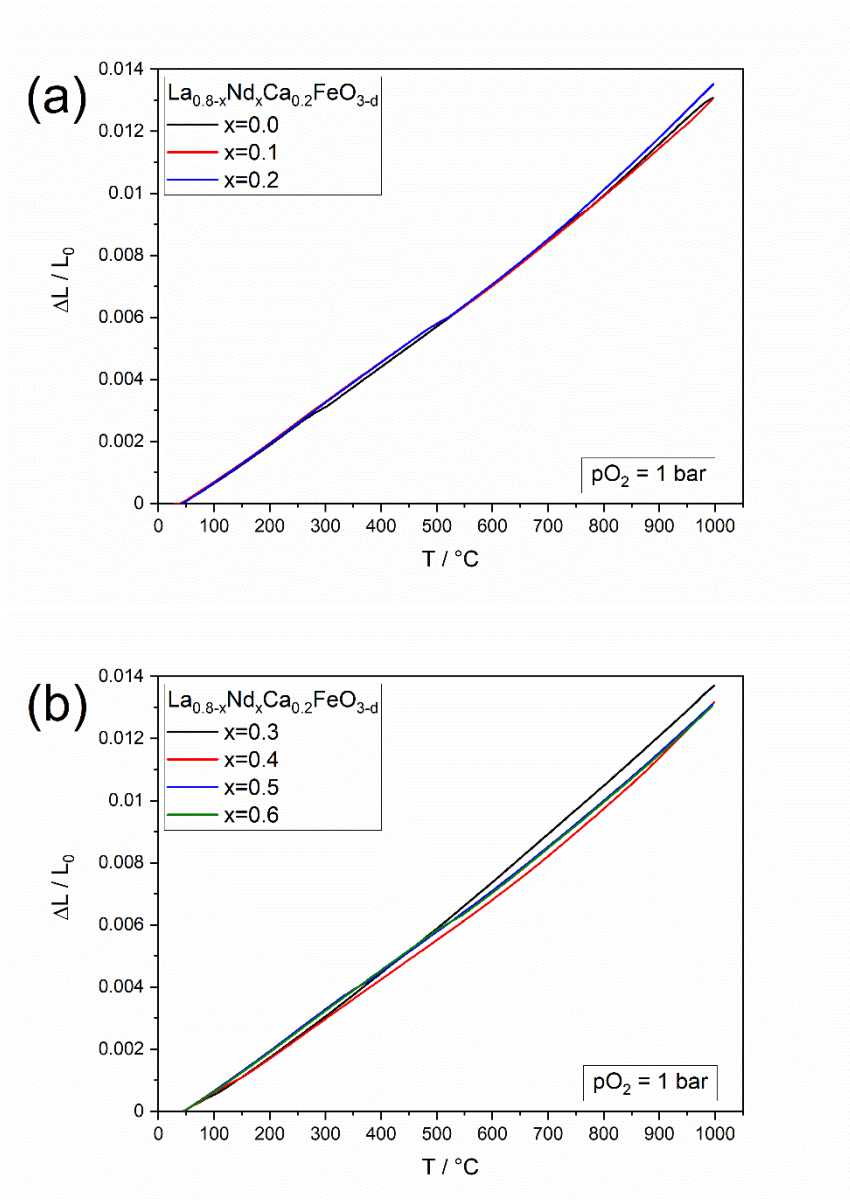

**Fig. S-2.** Thermal expansion of dense ceramic samples from the series  $\text{La}_{0.8-x}\text{Nd}_x\text{Ca}_{0.2}\text{FeO}_{3-\delta}$  ( $0 \leq x \leq 0.6$ ) for (a)  $x=0-0.2$  and (b)  $x=0.3-0.6$  at  $p\text{O}_2 = 1$  bar. The expansion curve of  $\text{La}_{0.8}\text{Ca}_{0.2}\text{FeO}_{3-\delta}$  ( $x=0$ ) was taken from [1].

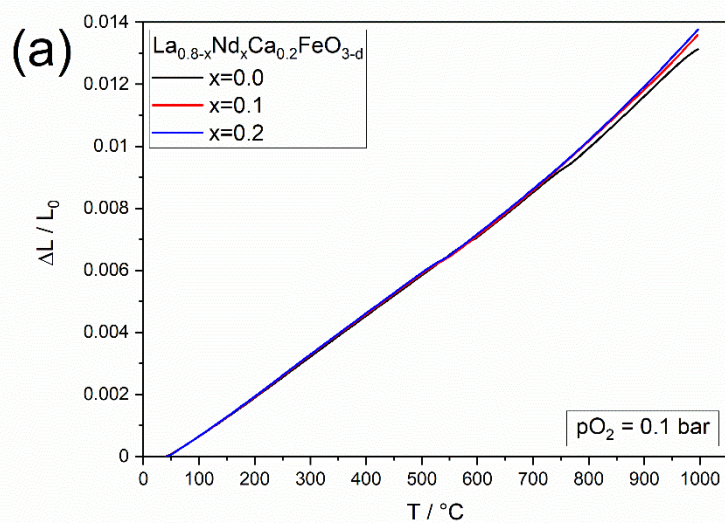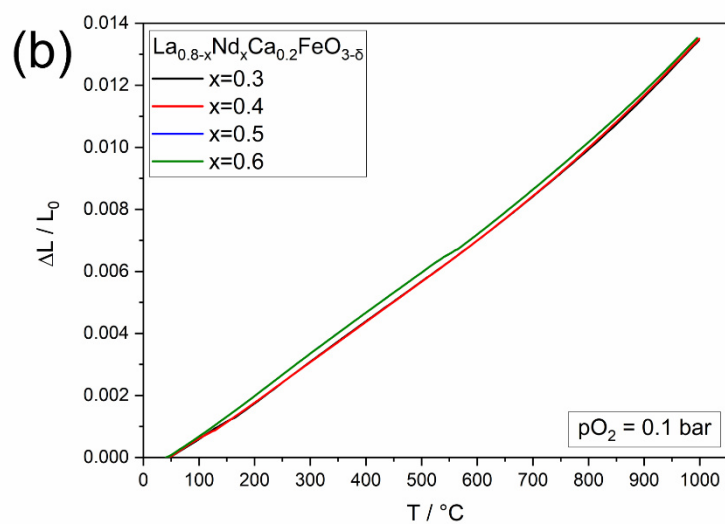

**Fig. S-3.** Thermal expansion of dense ceramic samples from the series  $\text{La}_{0.8-x}\text{Nd}_x\text{Ca}_{0.2}\text{FeO}_{3-\delta}$  ( $0 \leq x \leq 0.6$ ) for (a)  $x=0-0.2$  and (b)  $x=0.3-0.6$  (expansion curves for  $x=0.3$  and  $x=0.5$  superimpose with those of  $x=0.4$ ) at  $p\text{O}_2 = 0.1$  bar. The expansion curve of  $\text{La}_{0.8}\text{Ca}_{0.2}\text{FeO}_{3-\delta}$  ( $x=0$ ) was taken from [1].

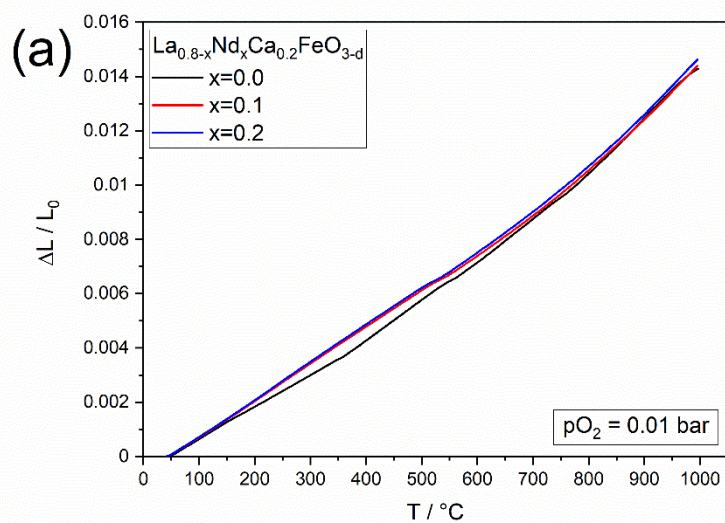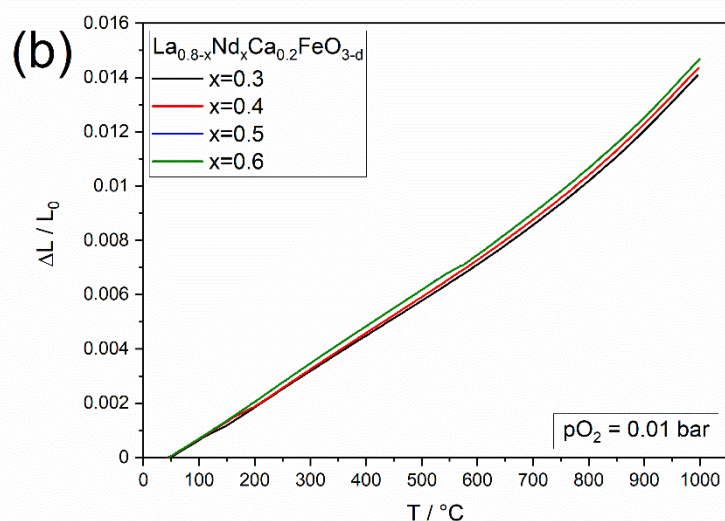

**Fig. S-4.** Thermal expansion of dense ceramic samples from the series  $\text{La}_{0.8-x}\text{Nd}_x\text{Ca}_{0.2}\text{FeO}_{3-\delta}$  ( $0 \leq x \leq 0.6$ ) for (a)  $x=0-0.2$  and (b)  $x=0.3-0.6$  (expansion curve for  $x=0.5$  superimpose with those of  $x=0.3$ ) at  $p\text{O}_2 = 0.01 \text{ bar}$ . The expansion curve of  $\text{La}_{0.8}\text{Ca}_{0.2}\text{FeO}_{3-\delta}$  ( $x=0$ ) was taken from [1].

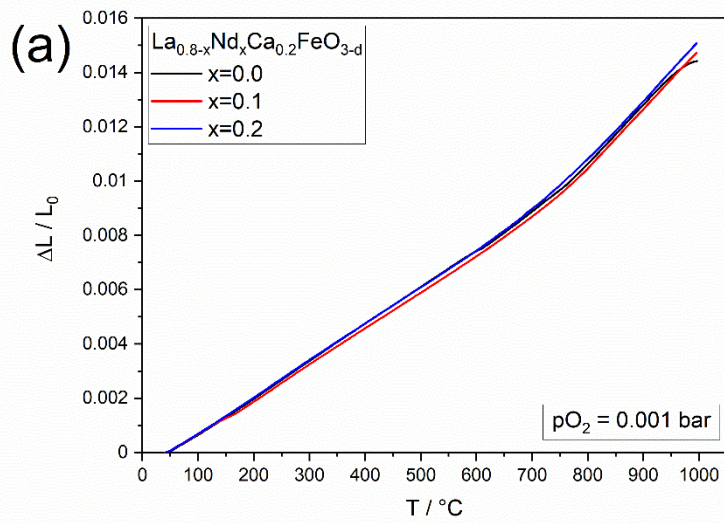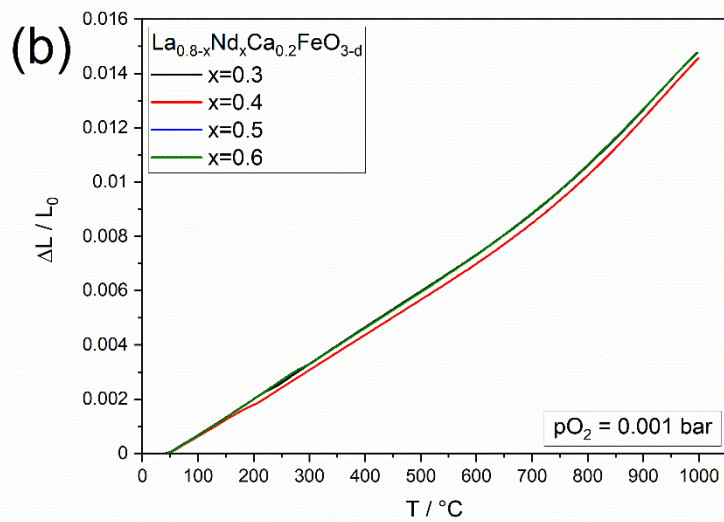

**Fig. S-5.** Thermal expansion of dense ceramic samples from the series  $\text{La}_{0.8-x}\text{Nd}_x\text{Ca}_{0.2}\text{FeO}_{3-\delta}$  ( $0 \leq x \leq 0.6$ ) for (a)  $x=0-0.2$  and (b)  $x=0.3-0.6$  (expansion curves for  $x=0.3$  and  $x=0.5$  superimpose with those of  $x=0.6$ ) at  $p\text{O}_2 = 0.001 \text{ bar}$ . The expansion curve of  $\text{La}_{0.8}\text{Ca}_{0.2}\text{FeO}_{3-\delta}$  ( $x=0$ ) was taken from [1].

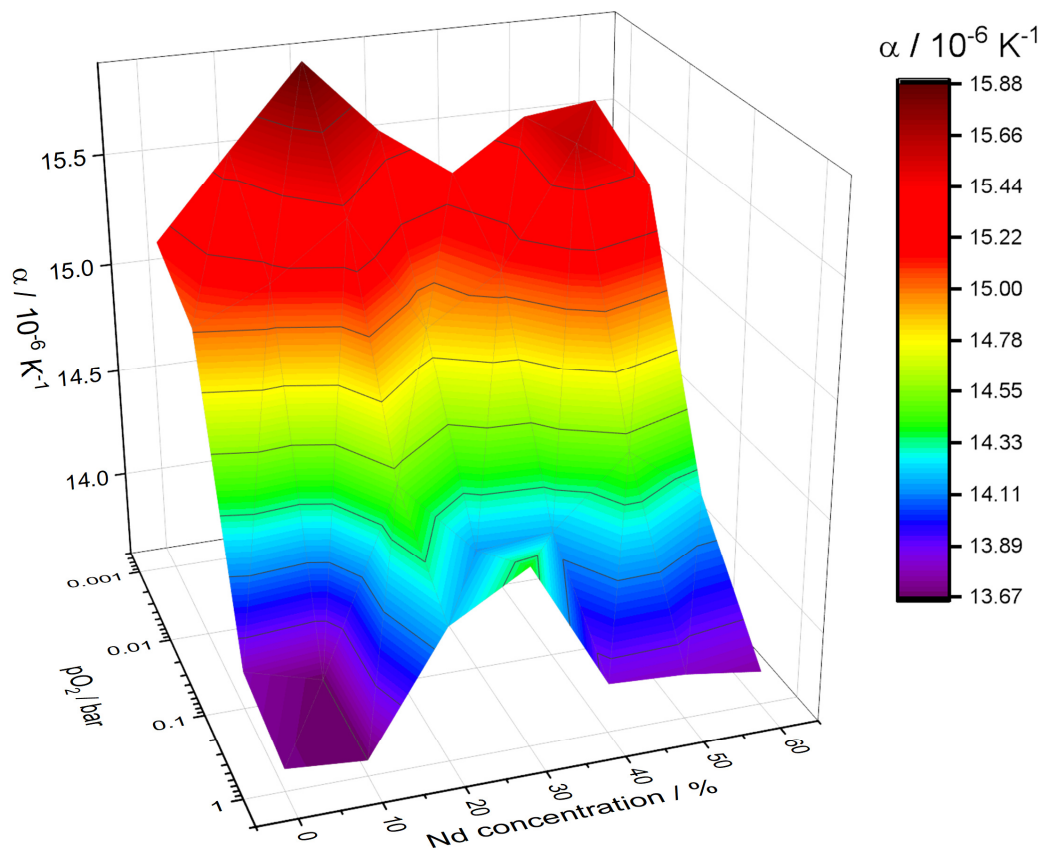

**Fig. S-6.** Average thermal expansion coefficients of  $\text{La}_{0.8-x}\text{Nd}_x\text{Ca}_{0.2}\text{FeO}_{3-\delta}$  ( $0 \leq x \leq 0.6$ ) in the temperature range  $50 \leq T/\text{°C} \leq 1000$  as a function of Nd concentration and oxygen partial pressure; data for the Nd-free compound was taken from literature [1].



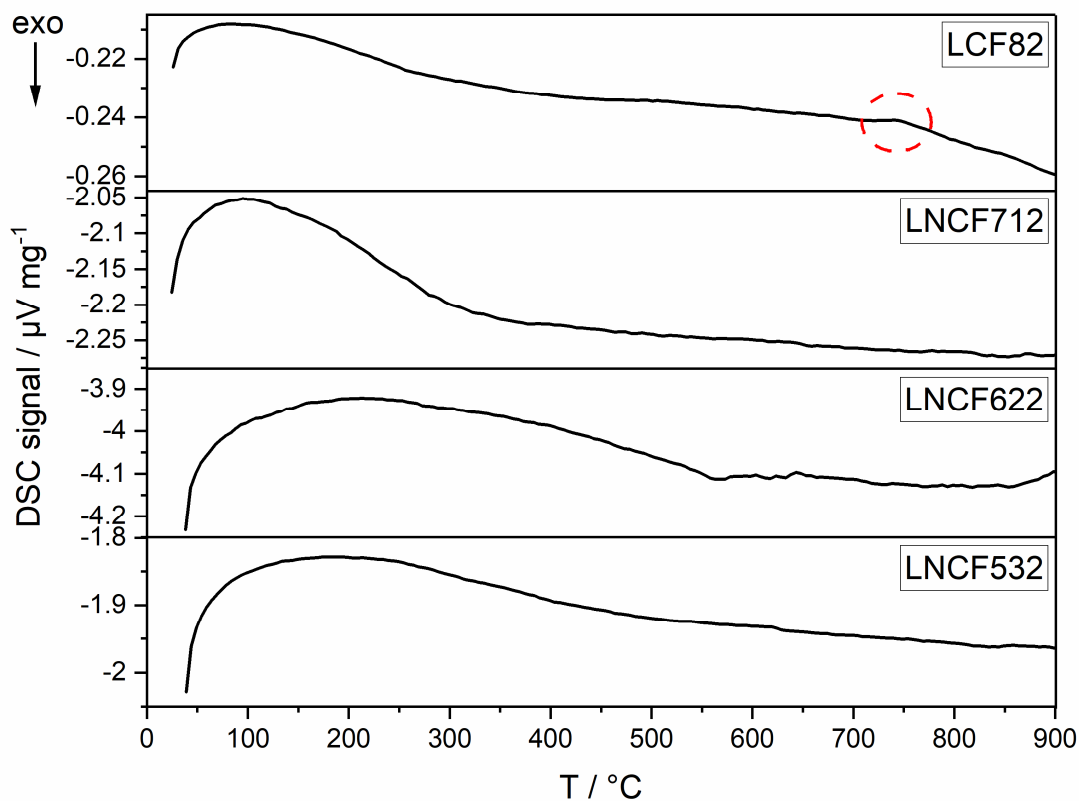

**Fig. S-7.** Differential scanning calorimetry (DSC) of  $\text{La}_{0.8-x}\text{Nd}_x\text{Ca}_{0.2}\text{FeO}_{3-\delta}$  (LCF82),  $\text{La}_{0.7}\text{Nd}_{0.1}\text{Ca}_{0.2}\text{FeO}_{3-\delta}$  (LNCF712),  $\text{La}_{0.6}\text{Nd}_{0.2}\text{Ca}_{0.2}\text{FeO}_{3-\delta}$  (LNCF622) and  $\text{La}_{0.5}\text{Nd}_{0.3}\text{Ca}_{0.2}\text{FeO}_{3-\delta}$  (LNCF532) in 20%  $\text{O}_2$ -rest Ar; The peak at approximately 740°C (for LCF82; dashed circle) is due to the reversible phase transformation from the orthorhombic to the trigonal modification, which was also reported by Price *et al.* [2]. In contrast, no peaks were observed for the Nd-containing compounds.

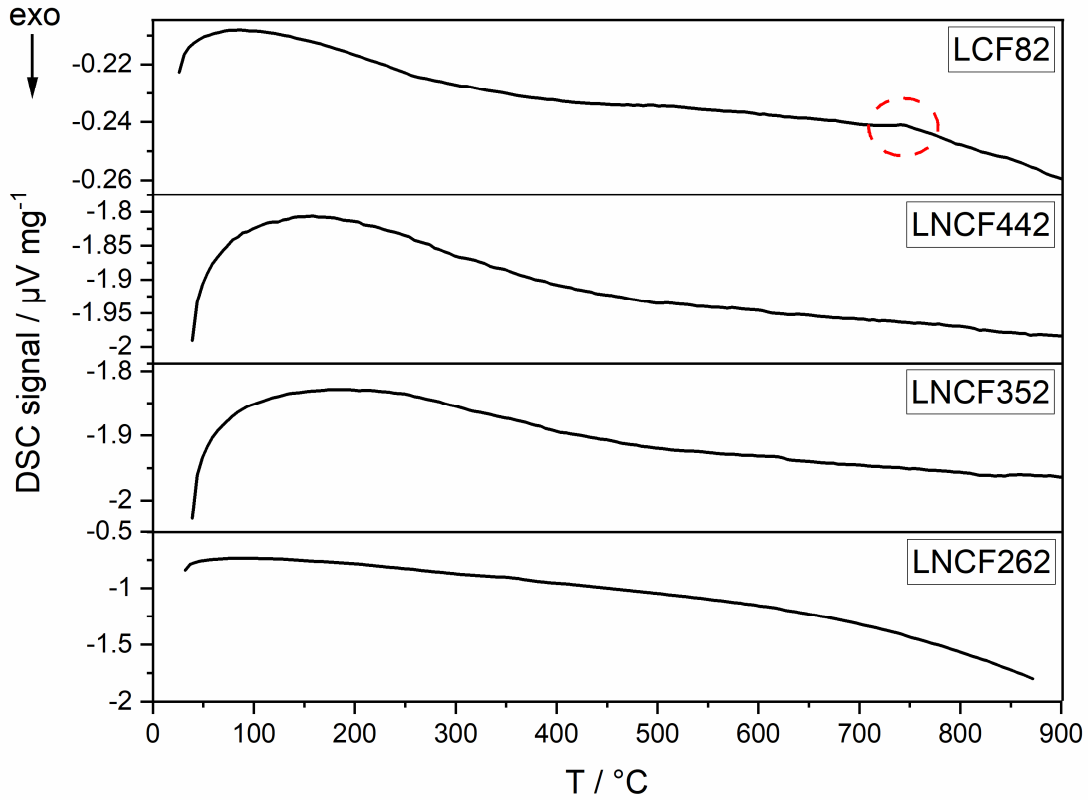

**Fig. S-8.** DSC of  $\text{La}_{0.8-x}\text{Nd}_x\text{Ca}_{0.2}\text{FeO}_{3-\delta}$  (LCF82),  $\text{La}_{0.4}\text{Nd}_{0.4}\text{Ca}_{0.2}\text{FeO}_{3-\delta}$  (LNCF442),  $\text{La}_{0.3}\text{Nd}_{0.5}\text{Ca}_{0.2}\text{FeO}_{3-\delta}$  (LNCF352) and  $\text{La}_{0.2}\text{Nd}_{0.6}\text{Ca}_{0.2}\text{FeO}_{3-\delta}$  (LNCF262) in 20%  $\text{O}_2$ -rest Ar; The peak at approximately 740°C (for LCF82; dashed circle) is due to the reversible phase transformation from the orthorhombic to the trigonal modification, which was also reported by Price *et al.* [2]. In contrast, no peaks were observed for the Nd-containing compounds.

## 2. References

- [1] Berger C, Bucher E, Windischbacher A, Boese AD, Sitte W (2018) Strontium-free rare earth perovskite ferrites with fast oxygen exchange kinetics: Experiment and theory. *J Solid State Chem* 259:57-66. doi:10.1016/j.jssc.2017.12.019
- [2] Price PM, Rabenberg E, Thomsen D, Misture ST, Butt DP (2014) Phase transformations in calcium-substituted lanthanum ferrite. *Journal of the American Ceramic Society* 97 (7):2241-2248. doi:10.1111/jace.12891
